# Supplementary material for: Development of sulfonated polystyrene resin-supported tungsten oxide for Pb2+ ion sequestration
Source: Royal Society of Chemistry journal article supplement (doi:10.1039/d5ra01017a), 2025-01-01
Supplement: d5ra01017a1.pdf [file d5ra01017a1.pdf]

## Supplementary information

### Development of sulfonated polystyrene resin-supported tungsten oxide for Pb<sup>2+</sup> ion sequestration

Kashmala Khaliq<sup>a</sup>, Mohsin Ali Raza Anjum<sup>b</sup>, Shabnam Shahida<sup>a\*</sup>, Ramzan Akhtar<sup>b</sup>, Adil Khan<sup>b</sup>, Munib Ahmad Shafiq<sup>c</sup>, Iqra Rafiq<sup>d</sup>, Muhammad Rehan<sup>e</sup>, Rashid Nazir Qureshi<sup>c</sup>, Sajid Iqbal<sup>f\*</sup>, Jong-Il Yun<sup>f\*</sup>, Muhammad Saifullah<sup>b\*</sup>

<sup>a</sup> Department of Chemistry, University of Poonch Rawalakot, AJK, Pakistan

<sup>b</sup> Chemistry Division, Pakistan Institute of Nuclear Science and Technology (PINSTECH), Nilore 45650, Islamabad, Pakistan

<sup>c</sup> Central Analytical Facility Division, Pakistan Institute of Nuclear Science and Technology (PINSTECH), Nilore 45650, Islamabad, Pakistan

<sup>d</sup> Department of Chemistry, Government College University Faisalabad (GCUF), Faisalabad, Pakistan

<sup>e</sup> Photovoltaic Research Department, Korea Institute of Energy Research, Daejeon, South Korea

<sup>f</sup> Department of Nuclear and Quantum Engineering, KAIST, 291 Deahak-ro, Yuseong-gu, Daejeon 34141, Republic of Korea

#### \*Corresponding Authors:

S. Shahida ([shabnamshahida01@gmail.com](mailto:shabnamshahida01@gmail.com)), S. Iqbal ([sajid1@kaist.ac.kr](mailto:sajid1@kaist.ac.kr)), J.-I. Yun ([jiyun@kaist.ac.kr](mailto:jiyun@kaist.ac.kr)), M. Saifullah ([saiifi.551@gmail.com](mailto:saiifi.551@gmail.com))

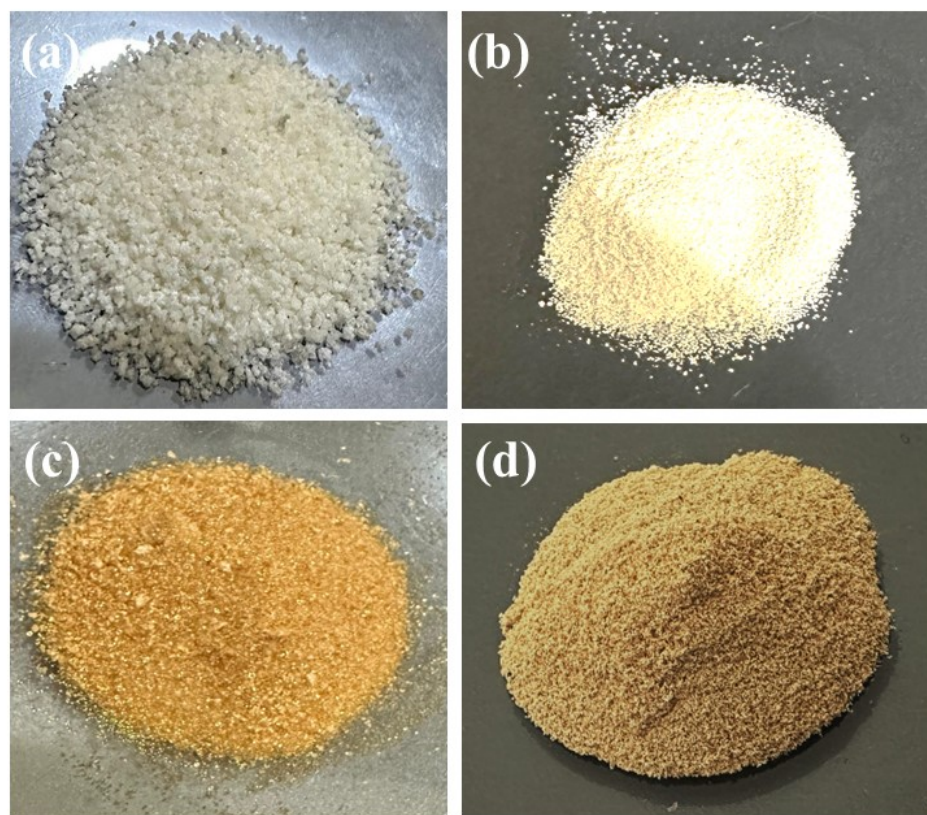

Fig. S1. Digital photographs of PS (a), PSWO (b), SO<sub>3</sub>-PS (c) and SO<sub>3</sub>-PSWO (d).

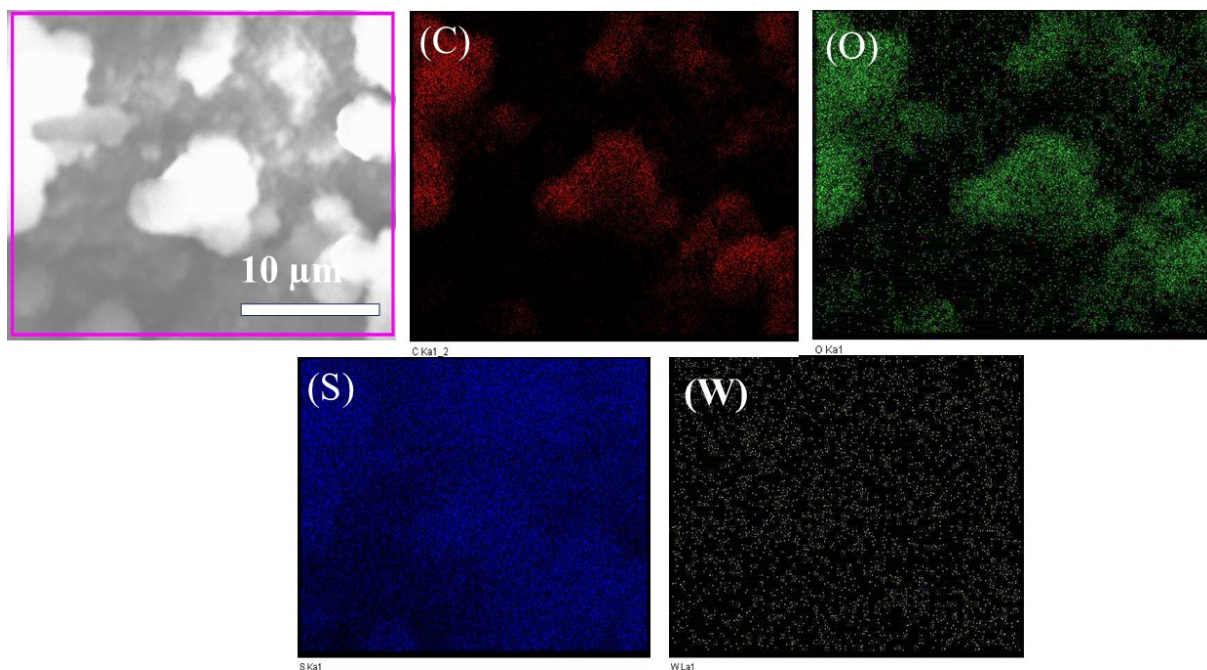

Fig. S2. Elemental dot mapping of SO<sub>3</sub>-PSWO.

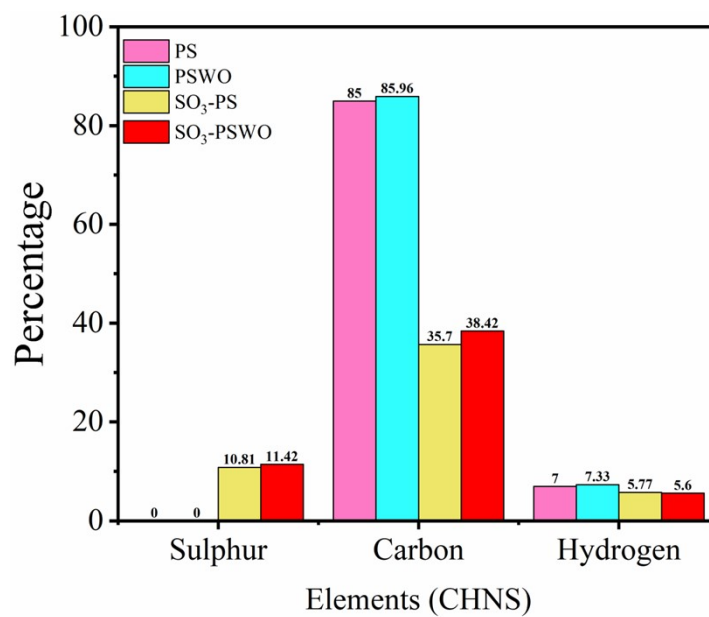

Fig. S3. C, H, and S concentration in prepared samples determined through CHNS analysis.

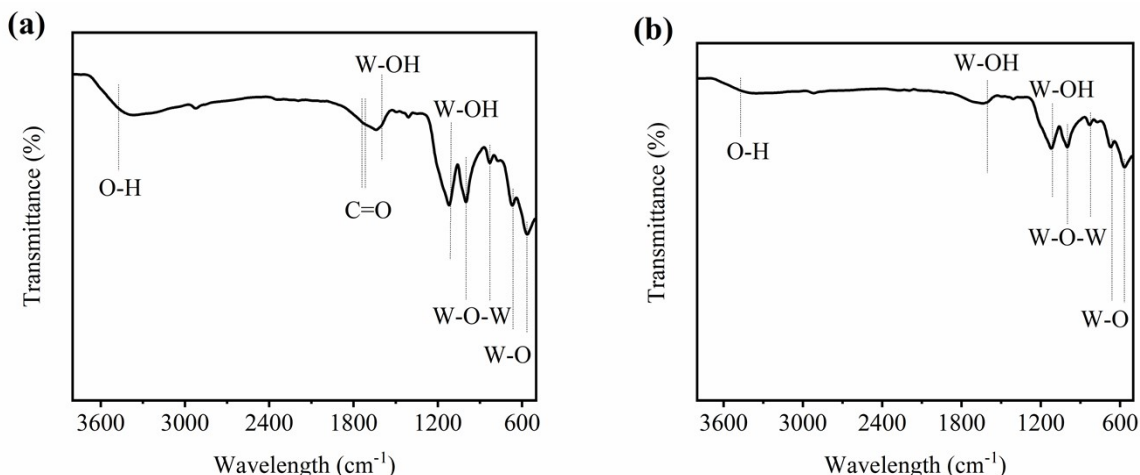

Fig. S4. FTIR Spectra of SO<sub>3</sub>-PSWO (a) before adsorption of Pb<sup>2+</sup> (b) after adsorption of Pb<sup>2+</sup>

The FTIR spectra of SO<sub>3</sub>-PSWO before adsorption (Fig. S4a) confirm the successful loading of tungsten. After adsorption, the decrease in peak intensity (Fig. S4b) indicates the adherence of Pb<sup>2+</sup> ions onto the SO<sub>3</sub>-PSWO surface.

Before adsorption (Fig. S4a), a broad band between 3800–3000 cm<sup>-1</sup> is observed in SO<sub>3</sub>-PSWO, attributed to the stretching vibrations of O–H groups in both surface W–OH and adsorbed water. This suggests the presence of tungsten oxide in the host resin<sup>1</sup>. However, after adsorption (Fig. S4b), this band decreases significantly, almost disappearing, likely due to Pb<sup>2+</sup> ions interacting with SO<sub>3</sub>-PSWO and occupying the adsorption sites.

A peak at 1728–1740 cm<sup>-1</sup> corresponds to the stretching vibrations of the C=O group, indicating the retention of some residual acetyl groups within the polymer matrix. This aligns with literature values for C=O stretching in lignocellulosic materials and cellulose acetylation<sup>2,3</sup>. After adsorption, the peak at 1728–1740 cm<sup>-1</sup> nearly vanishes.

At 1605 cm<sup>-1</sup>, a prominent peak represents the symmetric stretching vibrations associated with WO<sub>3</sub> and interlinked water molecules (W–OH, H<sub>2</sub>O)<sup>4,5</sup>. After Pb<sup>2+</sup> adsorption, interactions with W–OH groups alter their vibrational bands, leading to a decrease in peak intensity, as shown in Fig. S4b.

Another peak around  $1100\text{ cm}^{-1}$  in  $\text{SO}_3\text{-PSWO}$  corresponds to the bending vibrations of  $\text{W-OH}$ <sup>6</sup>. A similar peak has been reported in the work of Kustova et al. (2011), confirming this spectral range<sup>7</sup>. Following  $\text{Pb}^{2+}$  adsorption, the intensity decreases as the ions bind to  $\text{O-H}$  groups in tungsten oxide, reducing the number of free-bending vibrations.

In the  $1000\text{--}500\text{ cm}^{-1}$  range, multiple bands appear in  $\text{SO}_3\text{-PSWO}$ , attributed to vibrational modes of  $\text{W-O-W}$ ,  $\text{O-W-O}$ ,  $\text{W-O}$ ,  $\text{W-OH}$ , and  $\text{W=O}$  bonds<sup>6,8</sup>. These bands also decrease in intensity after  $\text{Pb}^{2+}$  adsorption, suggesting chemical interactions between  $\text{Pb}^{2+}$  ions and the active sites (e.g.,  $\text{W-OH}$  groups) on the resin surface. The observed reduction in peak intensity is likely due to the formation of chemical bonds between  $\text{Pb}^{2+}$  ions and these functional groups, which restrict their characteristic vibrational modes.

Thus, the surface coverage of  $\text{SO}_3\text{-PSWO}$  by  $\text{Pb}^{2+}$  ions and their interaction with functional groups during the adsorption process likely contribute to the observed decrease in peak intensity. This reduction is further supported by findings from H. Joga Rao (2020) <sup>9</sup>.

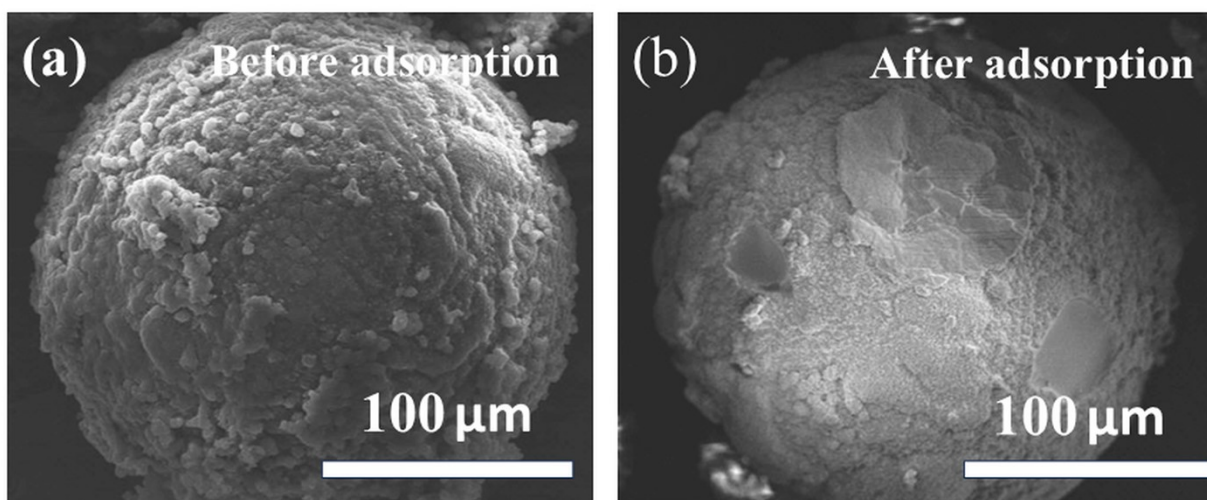

Fig. S5. SEM images of  $\text{SO}_3\text{-PSWO}$  before adsorption of  $\text{Pb}^{2+}$  (a) and after adsorption of  $\text{Pb}^{2+}$  (b).

## Reference

1. S. M. Kanan and C. P. Tripp, *Curr. Opin. Solid State Mater. Sci*, 2007, **11**, 19-27.
2. B. MOHEBI, *J. Agric. Sci. Technol*, 2008, 10: 253-259.

3. M. O. Adebajo and R. L. Frost, *Spectrochim. Acta A Mol. Biomol. Spectrosc*, 2004, **60**, 2315-2321.
4. V. B. Kumar and D. Mohanta, *Bull. Mater. Sci*, 2011, **34**, 435-442.
5. T. Muzaffar, R. Y. Khosa, U. Iftikhar, R. M. Obodo, S. Sajjad and M. Usman, *J. Clust. Sci*, 2021, 1-10.
6. R. Hatel and M. Baitoul, *Mater. Chem. Phys*, 2019, **225**, 169-173.
7. G. Kustova, Y. A. Chesalov, L. Plyasova and A. Nizovskii, *Vib. Spectrosc.*, 2011, **55**, 235-240.
8. S. Bai, Y. Ma, R. Luo, A. Chen and D. Li, *RSC Adv*, 2016, **6**, 2687-2694.
9. H. J. Rao, *Nat. Environ. Pollut. Technol*, 2021, **20**.
